# Supplementary material for: Implementation of a national AI technology program on cardiovascular outcomes and the health system
Source: Springer Nature journal article supplement (doi:10.1038/s41591-025-03620-y), 2025-04-04
Supplement: MOESM1 [file 41591_2025_3620_MOESM1_ESM.pdf]

# Implementation of a national AI technology program on cardiovascular outcomes and the health system

---

In the format provided by the  
authors and unedited

## Supplementary Material

**Supplementary Table 1**

Patient characteristics of the FFR-CT tested population at baseline

|                              | <b>FFR-CT Subgroup<br/>n (%)<br/>7863 (8.7)</b> |
|------------------------------|-------------------------------------------------|
| <b>Demographics</b>          |                                                 |
| Age at index CT scan (years) | 63 (55, 71)                                     |
| Female                       | 3023 (38.7)                                     |
| Type 1 Diabetes Mellitus     | 114 (1.5)                                       |
| Type 2 Diabetes Mellitus     | 1224 (15.6)                                     |
| Hyperlipidaemia              | 2627 (33.5)                                     |
| Hypertension                 | 3918 (50.0)                                     |
| Angina                       | 2454 (31.3)                                     |
| Myocardial Infarction        | 325 (4.1)                                       |
| Valve Disorder               | 618 (7.1)                                       |
| Heart Failure                | 681 (8.7)                                       |
| TIA                          | 73 (0.9)                                        |
| Cerebral Infarction          | 133 (1.7)                                       |
| Atherosclerosis              | 121 (1.5)                                       |
| Aortic Aneurysm              | 190 (2.4)                                       |
| COPD                         | 911 (11.5)                                      |
| Kidney Disease               | 516 (6.6)                                       |

Data are presented as number and %  
or number and 95th Confidence Interval

**Supplementary Table 2** Multivariable sensitivity analysis with FFRCT availability as an interaction term for predicting ICA

|                               | coef  | se    | p-value | coef  | se    | p-value | coef  | se    | p-value | coef  | se    | p-value |
|-------------------------------|-------|-------|---------|-------|-------|---------|-------|-------|---------|-------|-------|---------|
| FFR-CT available              | -     | 0.019 | 0.007   | -     | 0.034 | 0.052   | -     | 0.020 | 0.009   | -     | 0.019 | 0.002   |
| Age at index CT scan (years)* | 0.017 | 0.001 | <0.001  | 0.017 | 0.001 | <0.001  | 0.017 | 0.001 | <0.001  | 0.017 | 0.001 | <0.001  |
| Heart failure                 | 0.075 | 0.026 | 0.004   | 0.075 | 0.026 | 0.005   | 0.051 | 0.037 | 0.17    | 0.075 | 0.026 | 0.005   |
| Hypertension                  | 1.230 | 0.021 | <0.001  | 1.212 | 0.032 | <0.001  | 1.230 | 0.021 | <0.001  | 1.230 | 0.021 | <0.001  |
| Valve disease                 | 0.302 | 0.024 | <0.001  | 0.301 | 0.024 | <0.001  | 0.301 | 0.024 | <0.001  | 0.302 | 0.024 | <0.001  |
| COPD                          | 0.072 | 0.027 | 0.008   | 0.072 | 0.027 | 0.008   | 0.072 | 0.027 | 0.008   | 0.072 | 0.027 | 0.008   |
| Kidney disease                | -     | 0.029 | 0.02    | -     | 0.029 | 0.02    | -     | 0.029 | 0.02    | -     | 0.044 | 0.001   |
| FFR-CT available *            | 0.002 | 0.001 | 0.27    |       |       |         |       |       |         | 0.140 |       |         |
| Mean-centred age              |       |       |         |       |       |         |       |       |         |       |       |         |
| FFR-CT available *            |       |       |         | 0.03  | 0.04  | 0.45    |       |       |         |       |       |         |
| Hypertension                  |       |       |         |       |       |         |       |       |         |       |       |         |
| FFR-CT available *            |       |       |         |       |       |         | 0.042 | 0.046 | 0.36    |       |       |         |
| Heart failure                 |       |       |         |       |       |         |       |       |         |       |       |         |
| FFR-CT available *            |       |       |         |       |       |         |       |       |         | 0.127 | 0.055 | 0.02    |
| Kidney disease                |       |       |         |       |       |         |       |       |         |       |       |         |

\* Age was recalculated as mean-centered age for the interaction term to reduce multicollinearity.

**Supplementary Table 3** Propensity Matched Demographics and co-morbidities with the standardized mean difference (SMD)

|                              | <b>FFR-CT unavailable<br/>(n = 30665)</b> | <b>FFR-CT available<br/>(n = 30665)</b> | <b>SMD</b> |
|------------------------------|-------------------------------------------|-----------------------------------------|------------|
| Age at index CT scan (years) | 57 (49 to 66)                             | 57 (49 to 66)                           | -0.50      |
| Female                       | 15702 (51.2)                              | 16009 (52.2)                            | 2.00       |
| Type 1 Diabetes mellitus     | 183 (0.6)                                 | 141 (0.5)                               | -1.21      |
| Type 2 Diabetes mellitus     | 3301 (10.8)                               | 3465 (11.3)                             | 1.55       |
| Hyperlipidaemia              | 6110 (19.9)                               | 6201 (20.2)                             | 0.70       |
| Hypertension                 | 11252 (36.7)                              | 11269 (36.8)                            | 0.11       |
| Angina                       | 4583 (15)                                 | 4673 (15.2)                             | 0.76       |
| Myocardial infarction        | 746 (2.4)                                 | 697 (2.3)                               | -0.78      |
| Valve disorder               | 2483 (8.1)                                | 2402 (7.8)                              | -0.81      |
| Heart failure                | 1948 (6.4)                                | 1930 (6.3)                              | -0.20      |
| TIA                          | 103 (0.3)                                 | 101 (0.3)                               | -0.07      |
| Cerebral infarction          | 267 (0.9)                                 | 298 (1)                                 | 0.73       |
| Atherosclerosis              | 175 (0.6)                                 | 179 (0.6)                               | 0.11       |
| Aortic aneurysm              | 370 (1.2)                                 | 372 (1.2)                               | 0.04       |
| COPD                         | 1721 (5.6)                                | 1713 (5.6)                              | -0.10      |
| Kidney disease               | 1187 (3.9)                                | 1192 (3.9)                              | 0.07       |

**Supplementary Table 4**

Hospital Admission diagnostic codes from the OPCS Classification of Interventions and Procedures (OPCS-4) and equivalent International Statistical Classification of Diseases and Related Health Problems 10th Revision (ICD-10)-WHO Version for cause of death

|                                | <b>Hospital admission codes</b> | <b>Mortality codes</b>                                                                                                                                                                                                                                                                                                                                                                              |
|--------------------------------|---------------------------------|-----------------------------------------------------------------------------------------------------------------------------------------------------------------------------------------------------------------------------------------------------------------------------------------------------------------------------------------------------------------------------------------------------|
| <b>All Cause death</b>         |                                 | <b>A00-Z99</b>                                                                                                                                                                                                                                                                                                                                                                                      |
| <b>Cardiovascular death</b>    | <b>I00-I99</b>                  | <b>I100-102</b> Acute rheumatic fever<br><br><b>I105-109</b> Chronic rheumatic heart diseases<br><br><b>I110-115</b> Hypertensive diseases<br><br><b>I20-125</b> Ischaemic heart diseases<br><br><b>I30-152</b> Other forms of heart disease<br><br><b>I70-179</b> Diseases of arteries, arterioles and capillaries<br><br><b>I95-199</b> Other and unspecified disorders of the circulatory system |
| <b>Ischaemic Heart Disease</b> | <b>I20-I25</b>                  | <b>I21</b> Acute Myocardial Infarction<br><br><b>I22</b> Subsequent myocardial infarction<br><br><b>I23</b> Certain current complications following acute myocardial infarction<br><br><b>I24</b> Other acute ischaemic heart diseases                                                                                                                                                              |

|                                           |                                                                                                                                                                                                                                                                                                                           |                                                                                                                                                                                                                                                          |
|-------------------------------------------|---------------------------------------------------------------------------------------------------------------------------------------------------------------------------------------------------------------------------------------------------------------------------------------------------------------------------|----------------------------------------------------------------------------------------------------------------------------------------------------------------------------------------------------------------------------------------------------------|
|                                           |                                                                                                                                                                                                                                                                                                                           | <b>I25</b> Chronic ischaemic heart disease                                                                                                                                                                                                               |
| <b>Myocardial Infarct</b>                 | <b>I21-22</b>                                                                                                                                                                                                                                                                                                             | <b>I21</b> Acute myocardial infarction<br><br><b>I22</b> Subsequent myocardial infarction                                                                                                                                                                |
| <b>Cerebrovascular accident</b>           | <b>I60-I69</b>                                                                                                                                                                                                                                                                                                            | <b>I60</b> Subarachnoid haemorrhage<br><br><b>I61</b> Intracerebral haemorrhage<br><br><b>I62</b> Other nontraumatic intracranial haemorrhage<br><br><b>I63</b> Cerebral infarction<br><br><b>I64</b> Stroke, not specified as haemorrhage or infarction |
| <b>Invasive Coronary Angiogram</b>        | <b>K63</b> Contrast radiology of heart<br><br><b>K65.3</b> Catheterisation of left side of heart NEC                                                                                                                                                                                                                      |                                                                                                                                                                                                                                                          |
| <b>Percutaneous coronary intervention</b> | <b>K49</b> Percutaneous transluminal laser coronary angioplasty<br><br><b>K50.1</b> Other therapeutic transluminal operations on coronary artery<br><br><b>K75</b> Percutaneous transluminal balloon angioplasty and insertion of stent into coronary artery<br><br><b>K76</b> Transluminal operations on cardiac conduit |                                                                                                                                                                                                                                                          |
| <b>Coronary artery bypass grafting</b>    | <b>K40-46</b>                                                                                                                                                                                                                                                                                                             |                                                                                                                                                                                                                                                          |

### Supplementary Table 5

The 92 Cardiovascular diagnostic tests acquired from the Diagnostic Imaging Dataset (DIDS), categorized as per the National Interim Clinical Imaging Procedure code set (NICIP) used for the coding of clinical imaging procedures in electronic systems in the NHS.

| NCIP short code | NCIP Description                         | SCT-ID          | SNOMED description                                                                                  |
|-----------------|------------------------------------------|-----------------|-----------------------------------------------------------------------------------------------------|
| CACRY           | CT Cardiac angiogram coronary            | 419545005       | Computed tomography angiography of coronary arteries (procedure)                                    |
| FACLV           | Cardiac Angio Lt heart study             | 420136008       | Fluoroscopic angiography of left side of heart (procedure)                                          |
| FACRH           | Cardiac Angio Rt heart study             | 419177004       | Fluoroscopic angiography of right side of heart (procedure)                                         |
| FCARD           | Cardiac Angio coronaries                 | 419416005       | Fluoroscopic angiography of coronary arteries (procedure)                                           |
| FHART           | Fluoroscopy heart                        | 82327001        | Cardiac fluoroscopy (procedure)                                                                     |
| IACOAS          | Cardiac Angio coronary stent             | 418982001       | Fluoroscopic angiography of coronary artery and insertion of stent (procedure)                      |
| MCARD           | MRI Heart                                | 241620005       | Magnetic resonance imaging of heart (procedure)                                                     |
| MCORP           | MRI Cardiac perfusion                    | 419535008       | Magnetic resonance imaging perfusion study of heart (procedure)                                     |
| NCMPS           | NM Cardiac myocardial perfusion scan     | 252432008       | Radionuclide myocardial perfusion study (procedure)                                                 |
| CAAAG           | CT Angiogram aorta                       | 305053005       | Computed tomography of aorta (procedure)                                                            |
| CCASC           | CT Cardiac Cor artery calcium scoring    | 426005005       | Cardiac computed tomography for calcium scoring (procedure)                                         |
| FCARC           | Cardiac Angio congenital anomaly study   | 322201000000102 | Fluoroscopic percutaneous angiography of heart for congenital anomaly study (procedure)             |
| UTOEG           | US Transoesophageal echocardiogram       | 105376000       | Transesophageal echocardiography (procedure)                                                        |
| IACOAP          | Cardiac Angio PTCA                       | 429809004       | Fluoroscopic percutaneous transluminal angioplasty of coronary artery (procedure)                   |
| ICORD           | Intracoronary doppler                    | 431747006       | Intravascular ultrasound doppler imaging of coronary artery using fluoroscopic guidance (procedure) |
| IPWCAI          | Cardiac pressure wire and Cath insertion | 433031009       | Cardiac catheterization with insertion of pressure wire using fluoroscopic guidance (procedure)     |
| IPWPCI          | Cardiac pressure wire and PCI            | 431558000       | Insertion of cardiac pressure wire using fluoroscopic guidance (procedure)                          |

|        |                                      |           |                                                                                                                   |
|--------|--------------------------------------|-----------|-------------------------------------------------------------------------------------------------------------------|
| MAAOW  | MRA Aorta whole                      | 431431005 | Magnetic resonance imaging angiography of whole aorta (procedure)                                                 |
| MCRPS  | MRI Cardiac rest perfusion           | 431392001 | Magnetic resonance imaging of rest perfusion of heart (procedure)                                                 |
| MCSFS  | MRI Cardiac stress function study    | 431609005 | Magnetic resonance imaging stress study of cardiac function (procedure)                                           |
| MCSPS  | MRI Cardiac stress perfusion         | 431299007 | Magnetic resonance imaging of perfusion of heart under stress (procedure)                                         |
| MCVFS  | MRI Cardiac valvular function study  | 432845009 | Magnetic resonance imaging of cardiac valvular function (procedure)                                               |
| MCVIA  | MRI Cardiac myocardial viability     | 431940000 | Magnetic resonance imaging of heart for assessment of myocardial viability (procedure)                            |
| MCVVS  | MRI Cardiac ventricular volume study | 432846005 | Magnetic resonance imaging of cardiac ventricular volume (procedure)                                              |
| NCARDO | NM Cardiac rest PET FDG              | 432026001 | Positron emission tomography myocardial rest imaging using fluorodeoxyglucose (procedure)                         |
| NCARGO | NM Cardiac rest gated PET FDG        | 434267000 | Positron emission tomography electrocardiography gated myocardial rest study using fluorodeoxyglucose (procedure) |
| NCARSO | NM Cardiac stress PET Rb81           | 431901005 | Positron emission tomography myocardial stress imaging using rubidium 81 (procedure)                              |
| NCARVO | NM Cardiac viability scan PET FDG    | 433227008 | Positron emission tomography of heart for cardiac viability using fluorodeoxyglucose (procedure)                  |
| NCFPS  | NM Cardiac first pass angiogram      | 431942008 | Radionuclide cardiac first pass angiography (procedure)                                                           |
| NCGRTO | NM MPS Thallium rest gated           | 431644007 | Radionuclide electrocardiography gated myocardial perfusion rest study using thallium 201 (procedure)             |
| NCNRGO | NM Cardiac rest gated PET NH3        | 432943001 | Positron emission tomography electrocardiography gated myocardial rest study using N13 ammonia (procedure)        |
| NCRRNO | NM Cardiac rest PET Rb81             | 432847001 | Positron emission tomography myocardial rest imaging using rubidium 81 (procedure)                                |
| NMTLSO | NM MPS Thallium stress               | 431511008 | Myocardial perfusion stress imaging using Thallium 201 (procedure)                                                |
| NMTSGO | NM MPS Thallium stress gated         | 433630009 | Radionuclide electrocardiography gated myocardial perfusion stress study using thallium 201 (procedure)           |



|        |                                          |                 |                                                                                                                                             |
|--------|------------------------------------------|-----------------|---------------------------------------------------------------------------------------------------------------------------------------------|
| NRVEN  | NM Cardiac ventriculography rest         | 432115009       | Radionuclide ventriculography at cardiac rest (procedure)                                                                                   |
| NRVENO | NM Cardiac ventriculography rest SPECT   | 429801001       | Single photon emission computed tomography ventriculography at cardiac rest (procedure)                                                     |
| NSRNVO | NM Cardiac ventriculography stress SPECT | 429821000       | Single photon emission computed tomography cardiac stress ventriculography (procedure)                                                      |
| NSVEN  | NM Cardiac ventriculography stress       | 432155006       | Radionuclide ventriculography at cardiac stress (procedure)                                                                                 |
| UTE3D  | US Transthoracic echocardiogram 3D       | 434158009       | Transthoracic three dimensional ultrasonography of heart (procedure)                                                                        |
| UTECGC | US TTE with Contrast                     | 434167009       | Transthoracic ultrasonography of heart with contrast (procedure)                                                                            |
| UTESDC | US Stress echocardiogram with contrast   | 433862009       | Exercise stress ultrasonography of heart with contrast (procedure)                                                                          |
| UTIES  | US Tissue strain rate echocardiogram     | 431343007       | Ultrasonography of myocardium for tissue strain rate (procedure)                                                                            |
| IPAVR  | Percutaneous aortic valve replacement    | 377151000000105 | Percutaneous aortic valve replacement using fluoroscopic guidance (procedure)                                                               |
| UTOEGC | US TOE with contrast                     | 440467009       | Transesophageal echocardiography with contrast (procedure)                                                                                  |
| NCCAV  | NM Cardiac viability scan FDG PET CT     | 443249000       | Positron emission tomography with computed tomography of heart for cardiac viability using fluorodeoxyglucose (procedure)                   |
| NCCAG  | NM Cardiac rest gated FDG PET CT         | 443300009       | Positron emission tomography using fluorodeoxyglucose with computed tomography electrocardiography gated myocardial rest study (procedure)  |
| NCCNG  | NM Cardiac rest gated N13 PET CT         | 443277009       | Positron emission tomography using nitrogen 13 ammonia with computed tomography electrocardiography gated myocardial rest study (procedure) |
| NCCRF  | NM Cardiac rest FDG PET CT               | 443534009       | Positron emission tomography using fluorodeoxyglucose with computed tomography myocardial rest imaging (procedure)                          |
| NCCRE  | NM Cardiac rest Rb81 PET CT              | 443628005       | Positron emission tomography using rubidium 81 with computed tomography myocardial rest imaging (procedure)                                 |

|        |                                          |                 |                                                                                                                                                 |
|--------|------------------------------------------|-----------------|-------------------------------------------------------------------------------------------------------------------------------------------------|
| NCCRN  | NM Cardiac rest N13 PET CT               | 443535005       | Positron emission tomography using nitrogen 13 ammonia with computed tomography myocardial rest study (procedure)                               |
| NCCAS  | NM Cardiac stress Rb81 PET CT            | 443629002       | Positron emission tomography using rubidium 81 with computed tomography myocardial stress imaging (procedure)                                   |
| NMPSM  | NM MPS MIBI rest                         | 252434009       | Cardiac Tc-99m methoxyisobutyl isonitrile study (procedure)                                                                                     |
| ITAAVI | Pc transapical insertion aortic valve    | 444614006       | Percutaneous transapical insertion of aortic valve using fluoroscopic guidance (procedure)                                                      |
| CAOWHC | CT Aorta whole with contrast             | 444969006       | Computed tomography of entire aorta with contrast (procedure)                                                                                   |
| CAOTHC | CT Aorta thoracic with contrast          | 444970007       | Computed tomography of thoracic aorta with contrast (procedure)                                                                                 |
| CCAGA  | CT Cardiac gated                         | 241547009       | Computed tomography of heart (procedure)                                                                                                        |
| CCAGFC | CT Cardiac gated function with contrast  | 772801000000101 | Gated computed tomography for cardiac function with contrast (procedure)                                                                        |
| CCGCCC | CT Cardiac gated complex congenital Cont | 772821000000105 | Gated computed tomography for complex congenital heart disease with contrast (procedure)                                                        |
| UTO3D  | US Transoesophageal echocardiogram 3D    | 445864005       | Three dimensional transesophageal ultrasonography of heart (procedure)                                                                          |
| NMMRG  | NM MPS MIBI rest gated                   | 446182004       | Radionuclide electrocardiography gated myocardial perfusion rest study using technetium Tc <sup>99m</sup> methoxyisobutylisonitrile (procedure) |
| CCAGAC | CT Cardiac gated with contrast           | 448431001       | Gated computed tomography of heart with contrast (procedure)                                                                                    |
| NCPRTO | NM MPS Thallium rest and redistribution  | 826691000000108 | Radionuclide myocardial perfusion rest and redistribution study using thallium 201 (procedure)                                                  |
| NCTRGO | NM MPS Thallium rest and Redist gated    | 826711000000105 | Radionuclide electrocardiography gated myocardial perfusion rest and redistribution study using thallium 201 (procedure)                        |
| NCPCTO | NM MPS Thallium stress and Redist        | 826741000000106 | Radionuclide myocardial perfusion stress and redistribution study using thallium 201 (procedure)                                                |

|        |                                          |                 |                                                                                                                  |
|--------|------------------------------------------|-----------------|------------------------------------------------------------------------------------------------------------------|
| NJCGCO | NM MPS TI stress Redist and re-injection | 440335005       | Radionuclide imaging of perfusion of myocardium under stress and reinjection using Thallium 201 (procedure)      |
| MCAMFC | MRI Card morphology Func with contrast   | 449879007       | Magnetic resonance imaging for cardiac morphology and function with contrast (procedure)                         |
| MCHIL  | MRI Cardiac and hepatic iron load        | 442086001       | Magnetic resonance imaging of heart and liver for assessment of cardiac and hepatic iron load (procedure)        |
| MCMFS  | MRI Card morphology function stress      | 449882002       | Magnetic resonance imaging for cardiac morphology and function under stress (procedure)                          |
| MCMFSC | MRI Card Morph Func stress with contrast | 449883007       | Magnetic resonance imaging for cardiac morphology and function under stress with contrast (procedure)            |
| MCMFV  | MRI Card morphology Func velocity stress | 449878004       | Magnetic resonance imaging for cardiac morphology, function, and velocity under stress (procedure)               |
| MCMFVC | MRI Card Morph Func velocity with Cont   | 449880005       | Magnetic resonance imaging for cardiac morphology, function, and velocity with contrast (procedure)              |
| MCMOP  | MRI Cardiac morphology function          | 449876000       | Magnetic resonance imaging for cardiac morphology and function (procedure)                                       |
| MCMPV  | MRI Card morphology function velocity    | 449877009       | Magnetic resonance imaging for cardiac morphology, function, and velocity (procedure)                            |
| MMFVSC | MRI Card Morph Func velocity stress Cont | 449881009       | Magnetic resonance imaging for cardiac morphology, function, and velocity under stress with contrast (procedure) |
| IPCI   | Percutaneous coronary intervention       | 415070008       | Percutaneous coronary intervention (procedure)                                                                   |
| NSRB82 | NM Cardiac stress PET Rb82               | 818291000000100 | Positron emission tomography myocardial stress imaging using rubidium 82 (procedure)                             |
| NRRB82 | NM Cardiac rest PET Rb82                 | 818301000000101 | Positron emission tomography myocardial rest imaging using rubidium 82 (procedure)                               |
| CCORGC | CT Angio coronary artery graft           | 450506009       | Computed tomography angiography of coronary artery bypass graft (procedure)                                      |
| MAORTC | MRI Aorta with contrast                  | 450527004       | Magnetic resonance imaging of aorta with contrast (procedure)                                                    |
| MAOTHC | MRI Aorta thoracic with contrast         | 450528009       | Magnetic resonance imaging of thoracic aorta with contrast (procedure)                                           |
| NCNRNO | NM Cardiac rest PET NH3                  | 241441008       | Positron emission tomography (procedure)                                                                         |
| MACOA  | MRA Cardiac coronary arteries            | 419997008       | Magnetic resonance imaging (procedure)                                                                           |

|       |                                                                                                             |                 |                                           |
|-------|-------------------------------------------------------------------------------------------------------------|-----------------|-------------------------------------------|
| CMUGA | CT Cardiac multiple gated acquisition                                                                       | 431190000       | Computerized axial tomography (procedure) |
| UCORA | US Intracoronary                                                                                            | 431945005       | Diagnostic ultrasonography (procedure)    |
| FALCG | Cardiac Angio LV and Coronary Graft                                                                         | 440332008       | Fluoroscopy (procedure)                   |
| NMPTF | NM MPS Tf rest                                                                                              | 446874001       | Nuclear medicine procedure (procedure)    |
| NMTFS | NM MPS Tf stress gated                                                                                      | 446875000       | Nuclear medicine procedure (procedure)    |
| NMIST | Radionuclide myocardial perfusion stress study using technetium Tc <sup>99m</sup> methoxyisobutylisonitrile | 446876004       | Nuclear medicine procedure (procedure)    |
| NMTRG | NM MPS Tf rest gated                                                                                        | 447525000       | Nuclear medicine procedure (procedure)    |
| NMSTT | NM MPS Tf stress                                                                                            | 447526004       | Nuclear medicine procedure (procedure)    |
| NMMSG | Radionuclide electrocardiography gated myocardial perfusion stress study                                    | 447586001       | Nuclear medicine procedure (procedure)    |
| CTHXG | Gated CT thorax                                                                                             | 858161000000109 | Computerized axial tomography (procedure) |
| FOCAL | OCT Coronary artery Fluoro guided Left                                                                      | 912321000000101 | Fluoroscopy (procedure)                   |
| FOCAR | OCT Coronary artery Fluoro guided Left                                                                      | 912321000000101 | Fluoroscopy (procedure)                   |

**Supplementary Table 6: Socio-economic status of the overall population, per site and in those patients receiving the addition of the AI diagnostic decision tool**

| Hospital         | IMD04         | IMD pre-<br>FFRCT | IMD post-<br>FFRCT | IMD FFRCT<br>tested | FFRCT<br>utilisation (%) |
|------------------|---------------|-------------------|--------------------|---------------------|--------------------------|
| ASP              | 10.06 (±6.2)  | 10.5              | 10.8               | 10.2                | 6.3                      |
| BGH              | 18.45 (±10.7) | 17.5              | 18.2               | 18.8                | 8.4                      |
| BHL              | 26.58 (±19.4) | 29.0              | 29.4               | 26.7                | 12.2                     |
| BRI              | 19.56 (±14.7) | 21.8              | 21.5               | 20.8                | 9.6                      |
| BVH              | 19.65 (±15.2) | 25.4              | 25.9               | 20.2                | 4.8                      |
| EXE              | 16.53(±8.8)   | 16.6              | 16.7               | 16.9                | 3.1                      |
| FPH              | 14.2 (±10.2)  | 15.4              | 15.3               | 15.2                | 8.4                      |
| GWH              | 12.69 (±8.6)  | 14.4              | 13.9               | 12.6                | 17.2                     |
| HEY              | 25.78 (±19.7) | 24.8              | 25.7               | 25.0                | 8.4                      |
| HMN              | 22.62 (16.9)  | 23.5              | 21.9               | 21.0                | 3.5                      |
| LGI              | 25.95 (±18.9) | 25.7              | 26.2               | 25.5                | 8.1                      |
| MFT              | 28.98 (±18.6) | 29.4              | 29.8               | 27.0                | 16.6                     |
| NUH              | 27.42 (±19.1) | 27.3              | 28.2               | 27.1                | 16.8                     |
| PTM              | 18.28 (±12.9) | 18.8              | 18.3               | 18.2                | 1.1                      |
| RHX              | 24.93 (±14.6) | 23.6              | 23.7               | 22.9                | 5.4                      |
| RPH              | 14.29 (±10.1) | 15.2              | 15.6               | 14.4                | 7.3                      |
| RUH              | 13.24 (8.7)   | 13.9              | 13.0               | 12.7                | 20.8                     |
| STH              | 28.62 (±18.7) | 27.2              | 27.7               | 28.9                | 7.2                      |
| UHD              | 15.15 (±10.8) | 16.6              | 16.4               | 15.6                | 8.2                      |
| UHL              | 19.47 (±14.5) | 20.8              | 20.4               | 19.4                | 5.7                      |
| UHS              | 21.27 (±14.8) | 19.4              | 19.5               | 21.7                | 8.2                      |
| ULH              | 18.75 (±10.4) | 18.8              | 20.1               | 17.9                | 11.4                     |
| UNT              | 29.46 (±19.1) | 29.2              | 29.0               | 26.9                | 11.1                     |
| WHH              | 11.33 (±7.7)  | 12.4              | 12.5               | 11.3                | 10.9                     |
| WSH              | 15.63 (±8.7)  | 15.7              | 15.5               | 15.3                | 8.5                      |
|                  | 20.58         |                   |                    |                     |                          |
| <b>All sites</b> | ((±15.9)      | 20.52             | 20.61              | 20.1                | 8.7                      |

**Supplementary Table 7: Learning curve of using the AI decision support tool**

|                 | Stenosis specific<br>FFRCT ≤0.8*<br>n(%) |                           | Invasive<br>Coronary<br>Angiography<br>n(%) |                           | Revascularisation<br>n(%) |                           | Revascularisation<br>ratio<br>n(%) |                           | Downstream<br>Cardiac stress<br>tests<br>(rate per 1000<br>patients) |                           |
|-----------------|------------------------------------------|---------------------------|---------------------------------------------|---------------------------|---------------------------|---------------------------|------------------------------------|---------------------------|----------------------------------------------------------------------|---------------------------|
|                 | ≤ 75<br>cases                            | > 75<br>cases             | ≤ 75<br>cases                               | > 75<br>cases             | ≤ 75<br>cases             | > 75<br>cases             | ≤ 75<br>cases                      | > 75<br>cases             | ≤ 75<br>cases                                                        | > 75<br>cases             |
|                 |                                          |                           |                                             |                           |                           |                           |                                    |                           |                                                                      |                           |
| <b>Patients</b> | 951 /<br>1713<br>(55.5%)                 | 3246 /<br>5371<br>(60.4%) | 454 /<br>1873<br>(24.2%)                    | 1420 /<br>5963<br>(23.8%) | 364 /<br>1873<br>(19.4%)  | 1158 /<br>5963<br>(19.4%) | 364 /<br>682<br>(53.4%)            | 1158 /<br>2059<br>(56.2%) | 413 /<br>1873<br>(220.5)                                             | 1092 /<br>5963<br>(183.2) |

\*Stenosis specific (2cm distal to the stenosis) patients (n=7091) were used for clinical interpretation.

## Extended Data Figures

### Extended Data Figure 1

A map of NHS England with the 25 different NHS Trusts plotted, their corresponding Integrated Care Board (ICB) and number of patients (n) contributed to the study.

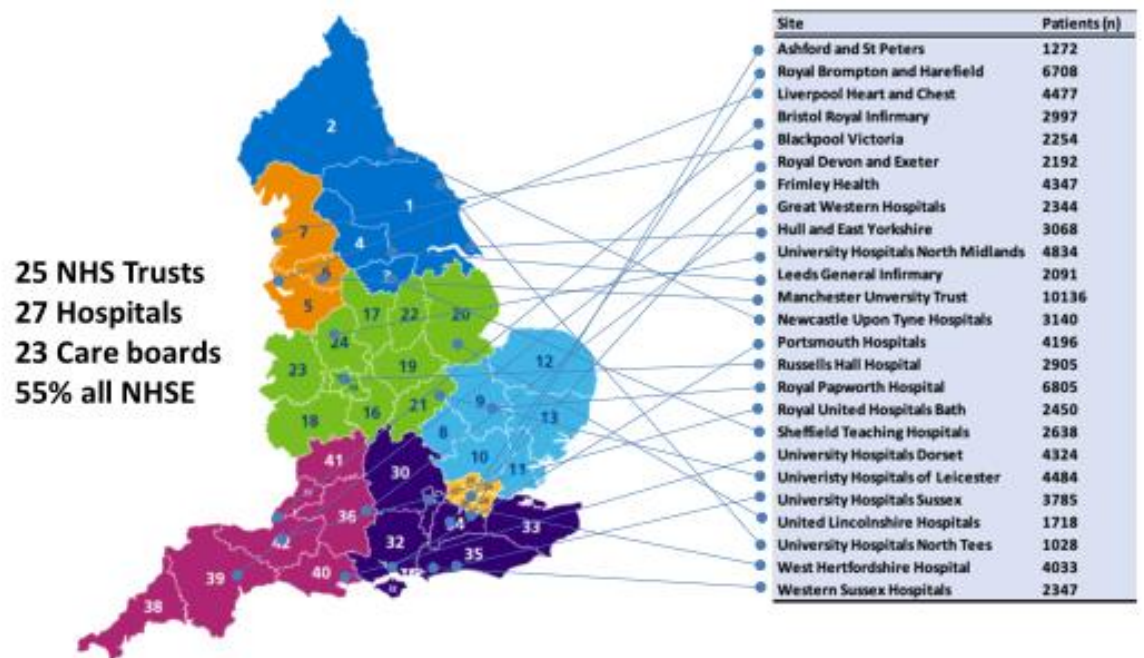

## Extended Data Figure 2

- Patient recruitment and drop out for 6 months, 12 months and 24 month time points: Categorized as pre (blue line) or post (red line) FFR-CT availability. All 27 sites provided patient data from April 2017 – April 2020 with 2 sites (UHD and BRI) providing data from April 2017-December 2020.
- Site FFR-CT availability: Introduction of FFR-CT at a site level was used to define whether the CCTA was performed before or after FFR-CT was made available at their site. The bubbles represent the time that FFR-CT was made available for clinical use and the number of CCTA scans performed at each site over the study recruitment time period (April 2017-December 2020).

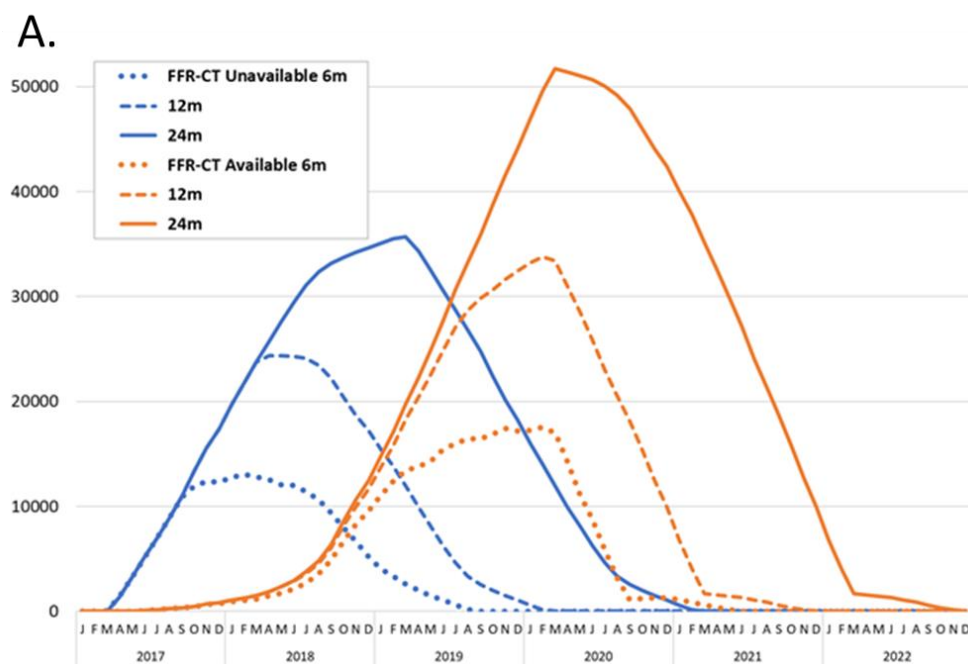

**B.**

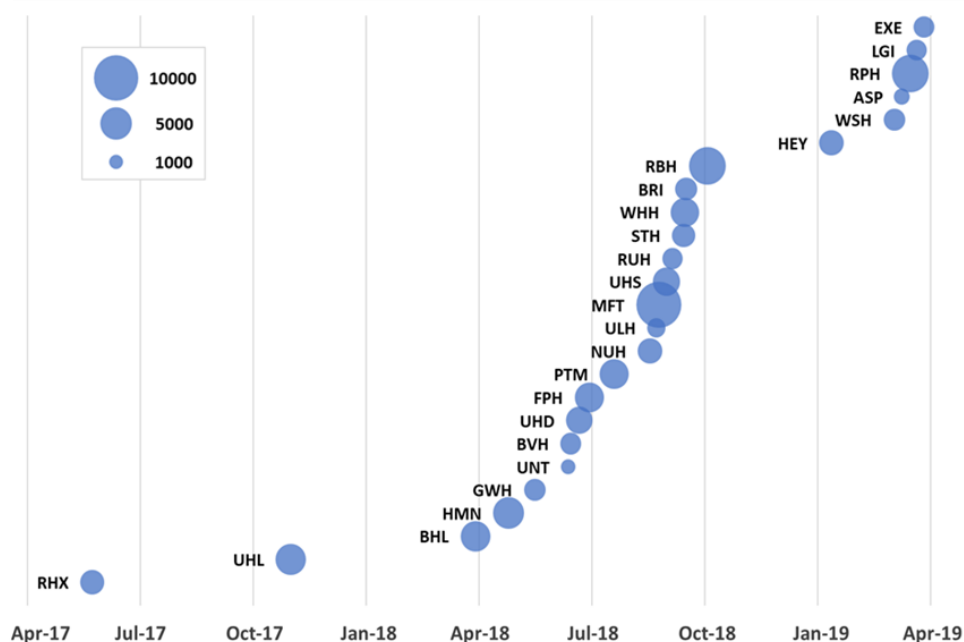

### Extended Data Figure 3

A. Myocardial Infarction (MI) events and B. Percutaneous Intervention (PCI) rates at 90 days, 1 year and 2 years.

Cox proportional hazards univariate analysis (unadjusted) p values. The shaded areas indicate the 95% CIs.

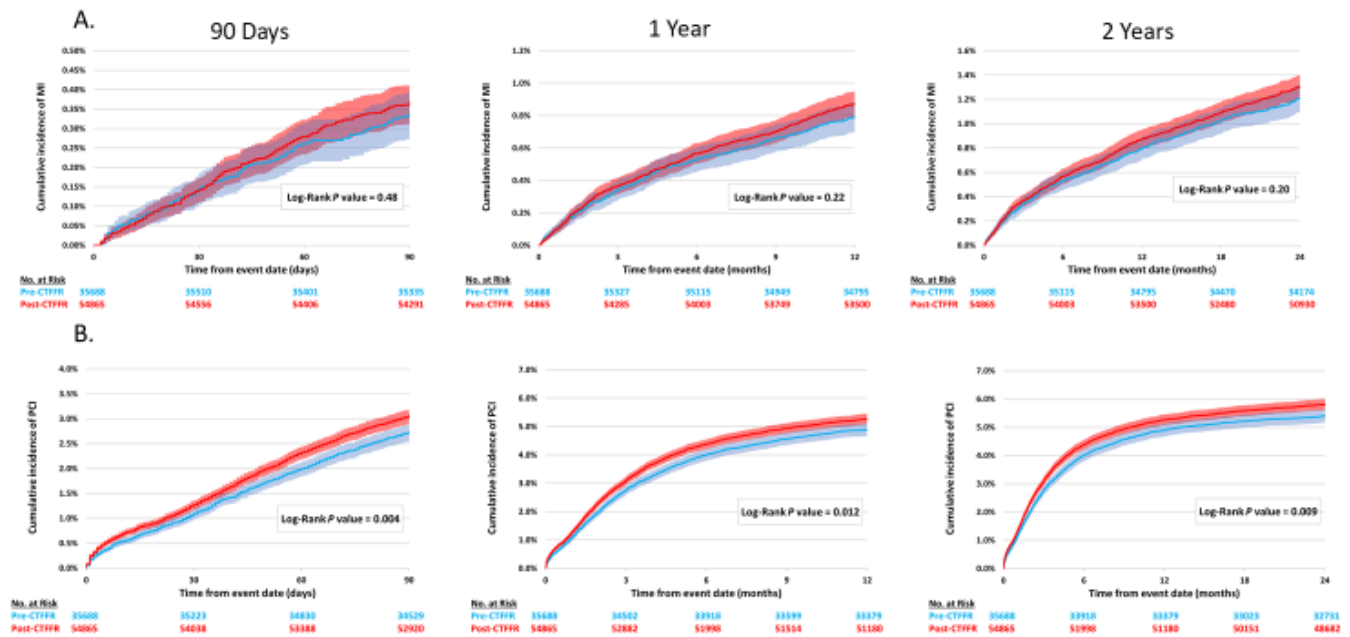



#### Extended Data Figure 4

Propensity Score Matching covariate balancing pre and post matching using a standard mean difference of <0.05.

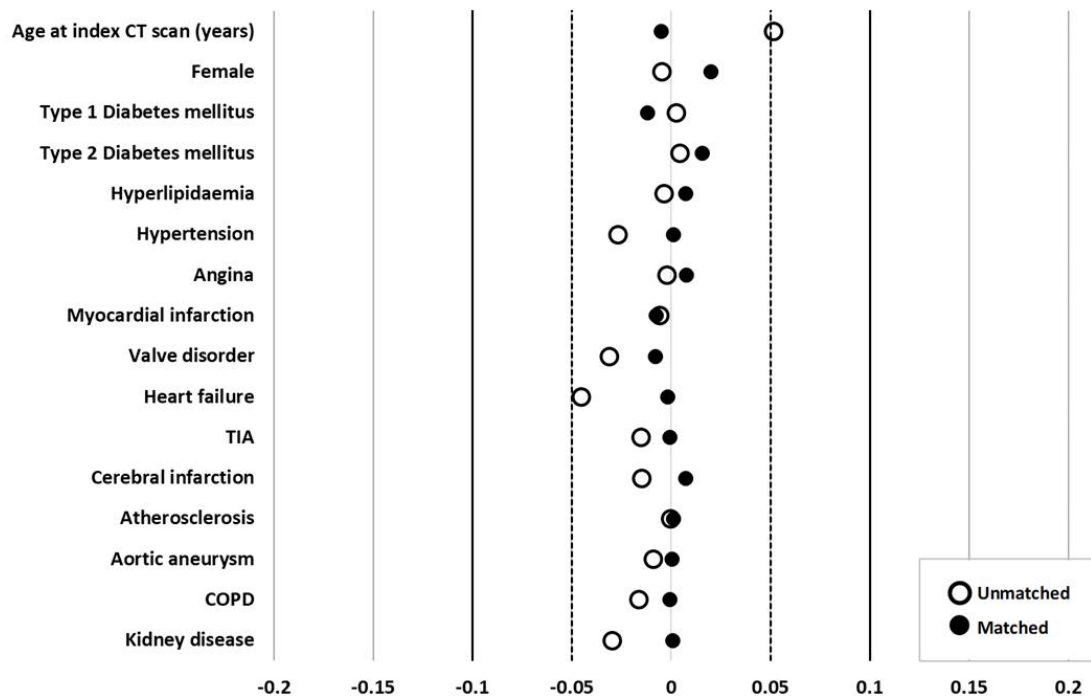

## Extended Data Figure 5

Kaplan-Meier (KM) charts of the cumulative incidence of the individual primary objectives over 2 years post index CCTA on the Propensity Matched population (n=30,665 in each group). Blue represents pre FFR-CT availability. Red line represents post FFR-CT availability. The shaded areas indicate the 95% CIs.

A. All-cause death, B. Cardiovascular death, C. Myocardial infarction, D. ICA with no revascularization.

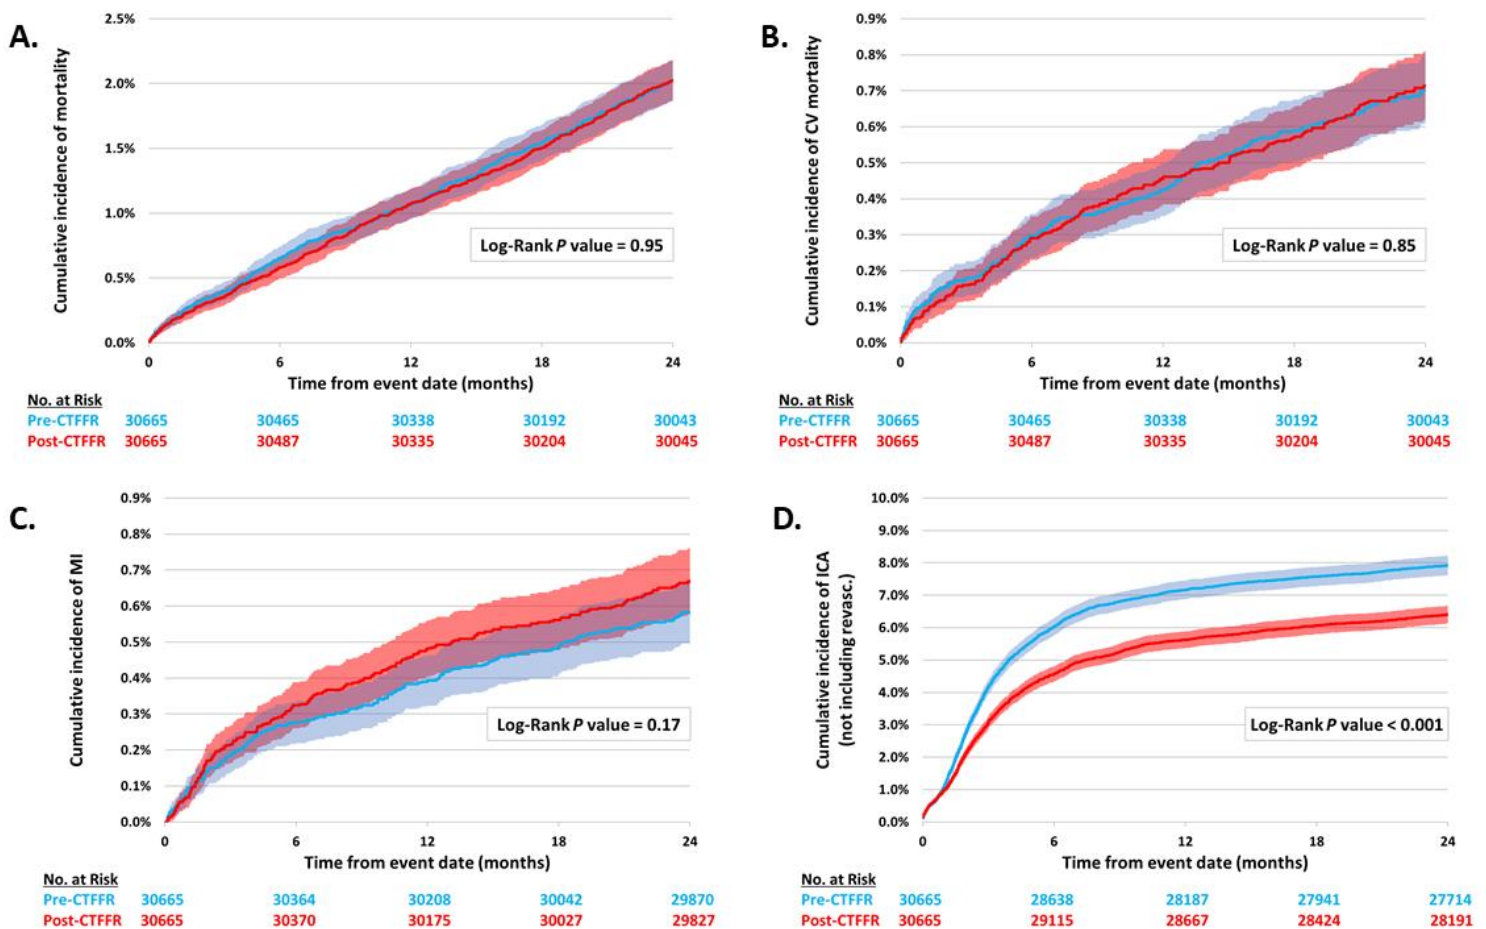

### Extended Data Figure 6

Time (in years) from CCTA date (Time 0) to the date of revascularisation (PCI or CABG) for the 6,784 patients who had coronary revascularisation within the 2-year follow-up. The mean wait was 0.41 years for both FFR-CT unavailable and FFR-CT available groups. The group who received FFR-CT had a insignificant shorter wait (0.4 years).

The box represents the interquartile range with the median as the middle segment, the mean as the black dot and the whiskers as minimum and maximum waits.

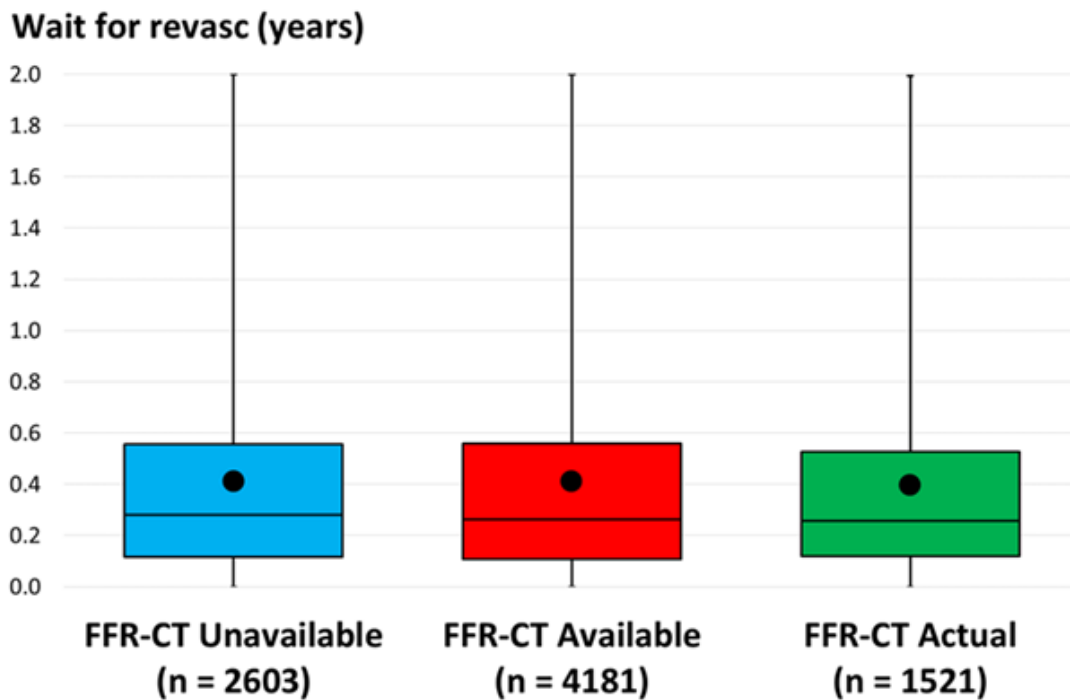

### Extended Data Figure 7

Autoregressive Integrated Moving Average (ARIMA) method were performed. Weekly observed rates of all primary outcomes were assessed before and after FFR-CT introduction, then modelled for observed versus expected changes in outcomes post-health intervention over time. The dashed black line represents the time that FFR-CT was made available to the hospital sites.

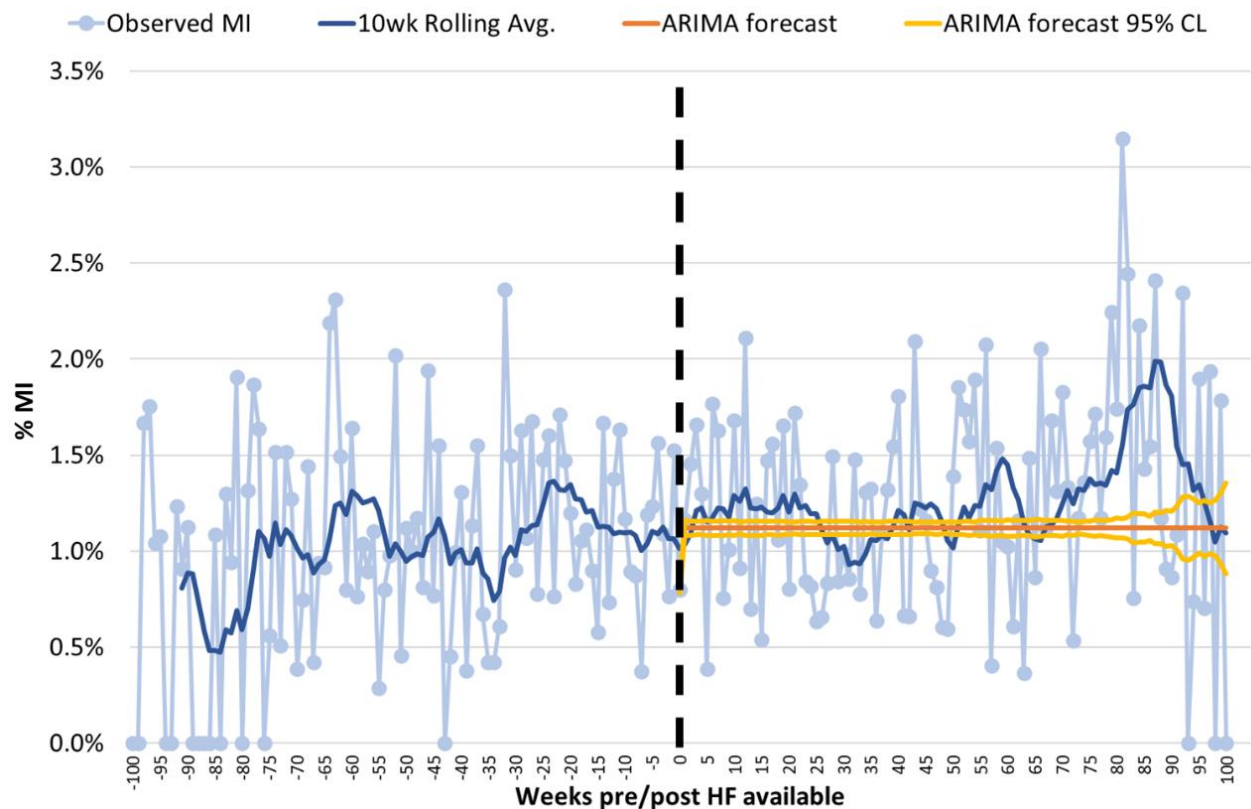

## Extended Data Figure 8

A positive FFR-CT (centre panel). The LAD shows a gradual reduction from proximal to distal vessel with a stenosis specific value of 0.72 and distal vessel value of 0.65. The circumflex was 'negative' at 0.89 and the RCA was occluded. The scale on the left panel shows the degree of flow limitation and likelihood of functional significance as a continuum with the margins of error on the right panel to help the physician in their decision process.

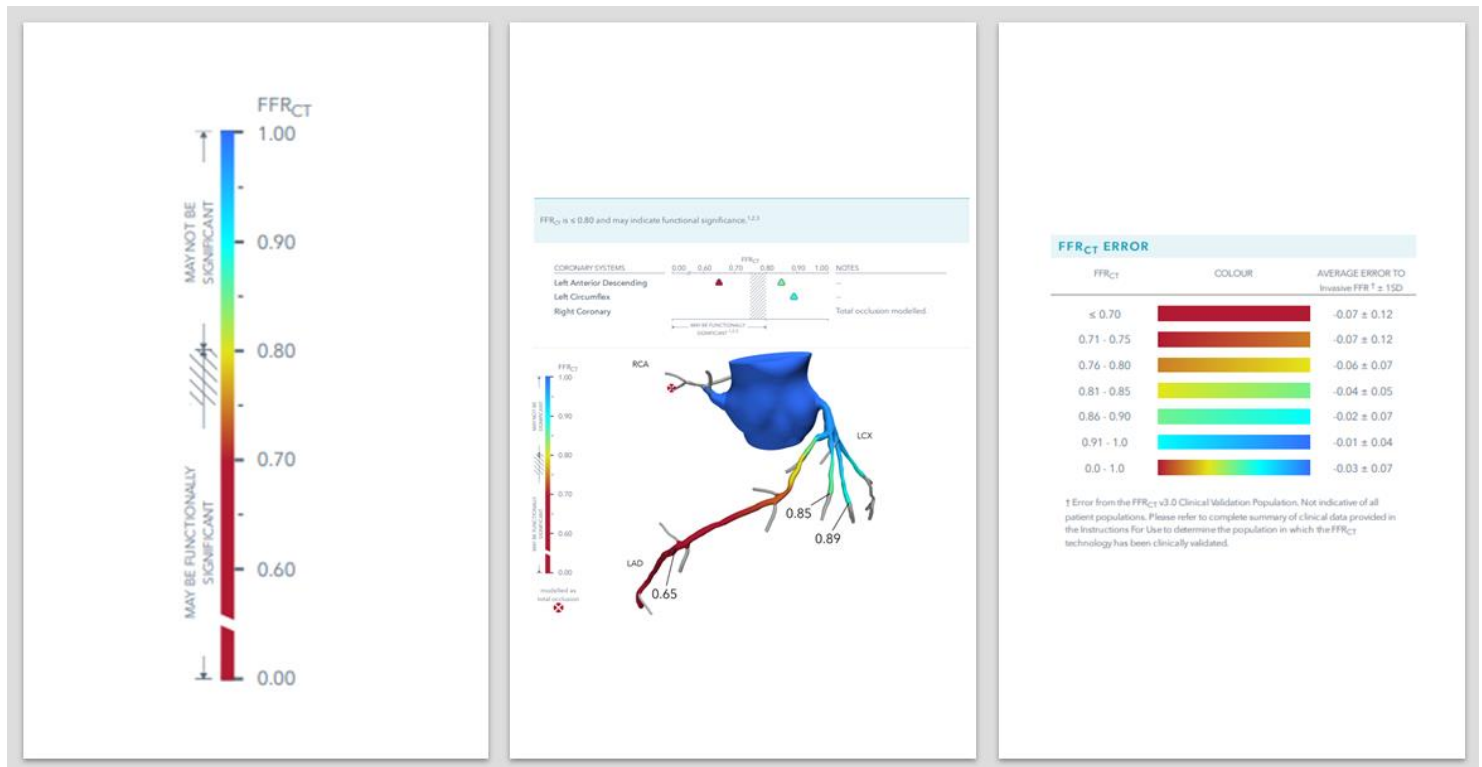

# The FISH&CHIPS Protocol

## FFRCT In Stable Heart disease and Coronary Computed Tomography Angiography Helps Improve Patient care and Societal costs

|                              |                                                                                                                                                                                                                                                                                                                                                                                                                                                                                                                                                                                                                                                                                                                                                                                                                                                          |
|------------------------------|----------------------------------------------------------------------------------------------------------------------------------------------------------------------------------------------------------------------------------------------------------------------------------------------------------------------------------------------------------------------------------------------------------------------------------------------------------------------------------------------------------------------------------------------------------------------------------------------------------------------------------------------------------------------------------------------------------------------------------------------------------------------------------------------------------------------------------------------------------|
| Study Objective              | The primary objective of FISH and CHIPS is to identify differences in health-related events, time to diagnosis and overall healthcare costs of a stable chest pain population undergoing Coronary Computed Tomography Angiography (CCTA) and Fractional Flow Reserve (FFR <sub>CT</sub> ), compared to a previous 'standard of care' diagnostic chest pain pathway of CCTA and non-invasive functional testing.                                                                                                                                                                                                                                                                                                                                                                                                                                          |
| Study Design                 | This is a multi-centre, retrospective, observational analytic cohort study design. The study will utilise the electronic health record (EHR) data already collected by NHS England on all patients that underwent a CCTA for the assessment of coronary artery disease over a 3-year period (April 2017-April 2020). All patients were treated in accordance with the latest NICE clinical guidance (CG 95 2016). Healthcare data will be collected from 6 months prior to and 12 months following the index CCTA. Hospital admissions data collected will include inpatient hospital admissions, outpatient visits, cardiovascular diagnostic tests and procedures. All subsequent clinical events including myocardial infarction and all-cause death will be measured as clinical outcomes. Costs are determined from the NHS national tariff system. |
| Study Principal Investigator | Dr Timothy Fairbairn<br>Liverpool Heart and Chest Hospital and the University of Liverpool,<br>Thomas Drive,<br>Liverpool,<br>L14 3PE<br>United Kingdom                                                                                                                                                                                                                                                                                                                                                                                                                                                                                                                                                                                                                                                                                                  |
| Sponsor                      | Liverpool Heart and Chest Hospital,<br>Thomas Drive,<br>Liverpool,<br>L14 3PE<br>United Kingdom                                                                                                                                                                                                                                                                                                                                                                                                                                                                                                                                                                                                                                                                                                                                                          |

## RESEARCH REFERENCE NUMBERS

|                                                    |                |
|----------------------------------------------------|----------------|
| <b>IRAS Number:</b>                                | 285996         |
| <b>ISRCTN Number / Clinical trials.gov Number:</b> | ISRCTN57392292 |
| <b>FUNDERS Number:</b>                             | MR/T024933/1   |

## Investigator Protocol Signature Page

The undersigned confirm that the following protocol has been agreed and accepted and that the Chief Investigator agrees to conduct the trial in compliance with the approved protocol and will adhere to the principles outlined in the Medicines for Human Use (Clinical Trials) Regulations 2004 (SI 2004/1031), amended regulations (SI 2006/1928) and any subsequent amendments of the clinical trial regulations, GCP guidelines, the Sponsor's (and any other relevant) SOPs, and other regulatory requirements as amended.

I agree to ensure that the confidential information contained in this document will not be used for any other purpose other than the evaluation or conduct of the clinical investigation without the prior written consent of the Sponsor. I agree to allow the University of Liverpool monitors and auditors and their designees full access to all medical records at the research facility for participants entered in the study. I agree to comply with NHS England's information governance alliance (IGA) General Data Protection Regulation (GDPR) guidance.

I also confirm that I will make the findings of the trial publically available through publication or other dissemination tools without any unnecessary delay and that an honest accurate and transparent account of the trial will be given; and that any discrepancies and serious breaches of GCP from the trial as planned in this protocol will be explained.

### For and on behalf of the Trial Sponsor:

Signature:



Name: (please print): Jennifer Crooks Deputy Director of Research and Innovation

### Chief Investigator:

Signature:



Name: (please print): Dr Timothy Fairbairn

Date: 22/6/22

Key Trial Contacts

|                    |                      |
|--------------------|----------------------|
| Chief Investigator | Dr Timothy Fairbairn |
|--------------------|----------------------|



|                                       |                                                                                                                                                                                                                 |
|---------------------------------------|-----------------------------------------------------------------------------------------------------------------------------------------------------------------------------------------------------------------|
|                                       | t: 0151 600 1477<br>e: <a href="mailto:timothy.fairbairn@lhch.nhs.uk">timothy.fairbairn@lhch.nhs.uk</a>                                                                                                         |
| <b>Trial Co-ordinator</b>             | Mr Ian Kemp<br>t: 0151 228 1158<br>e: <a href="mailto:ian.kemp@lhch.nhs.uk">ian.kemp@lhch.nhs.uk</a>                                                                                                            |
| <b>Sponsor</b>                        | Liverpool Heart and Chest Hospital NHS Trust<br>Thomas Drive,<br>Liverpool,<br>L14 3PE<br>United Kingdom<br>t: 0151 600 1467<br>e: <a href="mailto:jennifer.crooks@lhch.nhs.uk">jennifer.crooks@lhch.nhs.uk</a> |
| <b>Joint-sponsor(s)/co-sponsor(s)</b> | NA                                                                                                                                                                                                              |
| <b>Funder(s)</b>                      | Medical Research Council (Funders number MR/T024933/1)<br>and Heartflow                                                                                                                                         |
| <b>Clinical Trials Unit</b>           | Liverpool Heart and Chest Clinical Trials \ monitoring officer<br>t: 0151 600 1013<br>e: <a href="mailto:Colette.mcgee@lhch.nhs.uk">Colette.mcgee@lhch.nhs.uk</a>                                               |
| <b>Key Protocol Contributors</b>      | Dr Timothy Fairbairn, Chief Investigator<br>Professor Rod Stables, CTU lead                                                                                                                                     |
| <b>Committees</b>                     | Liverpool Heart and Chest hospital Research and Ethics Committee,<br>Liverpool Health Partners (LHP) Single Point of Access to Research and Knowledge (SPARK) Joint Research Sponsorship Committee              |

# 1 Table of Contents

|                                              |    |
|----------------------------------------------|----|
| Key Trial Contacts.....                      | 23 |
| 1 Table of Contents.....                     | 25 |
| 2 Abbreviations .....                        | 27 |
| 3 Summary .....                              | 28 |
| 3.1 Professional Summary .....               | 28 |
| 3.2 Plain English Summary .....              | 29 |
| 4 Introduction .....                         | 30 |
| 4.1 Background .....                         | 30 |
| 4.2 Study Rationale .....                    | 30 |
| 5 Study Objectives .....                     | 31 |
| 5.1 Primary objective .....                  | 31 |
| 5.2 Secondary objective.....                 | 31 |
| 5.3 Primary Endpoints:.....                  | 31 |
| 5.4 Exploratory Endpoints:.....              | 31 |
| 5.4.1 Qualitative Assessment.....            | 32 |
| 5.4.2 Imaging biomarkers .....               | 32 |
| 6 Study Design.....                          | 32 |
| 7 Study Population.....                      | 33 |
| 7.1 Setting and Target Population .....      | 33 |
| 7.2 Inclusion Criteria .....                 | 34 |
| 7.2.1 Site eligibility: .....                | 34 |
| 7.2.2 Individual eligibility: .....          | 34 |
| 7.3 Exclusion Criteria.....                  | 34 |
| 7.4 Follow up.....                           | 34 |
| 8 Statistical Methodology .....              | 35 |
| 8.1 Sample size and Power calculation.....   | 35 |
| 8.2 Statistical Analysis.....                | 36 |
| 9 Good Clinical Practice .....               | 36 |
| 9.1 Ethical Conduct .....                    | 36 |
| 9.1.1 Informed Consent .....                 | 36 |
| 9.1.2 Good Clinical Practice (GCP) .....     | 37 |
| 9.2 Data Management and Confidentiality..... | 37 |
| 9.2.1 Data Collection.....                   | 37 |

|       |                       |    |
|-------|-----------------------|----|
| 9.2.2 | FFRCT Data .....      | 37 |
| 9.2.3 | Trial Management..... | 37 |
| 10    | References .....      | 38 |

## 2 Abbreviations

|                   |                                          |
|-------------------|------------------------------------------|
| CABG              | Coronary Artery Bypass Grafting          |
| CAD               | Coronary Artery Disease                  |
| CCTA              | Coronary Computed Tomography Angiography |
| CEC               | Clinical Events Committee                |
| DS                | Degree Stenosis                          |
| FFR               | Fractional Flow Reserve                  |
| FFR <sub>CT</sub> | CCTA-derived fractional flow reserve     |
| ICA               | Invasive Coronary Angiography            |
| IHD               | Ischemic Heart Disease                   |
| IRB               | Institutional Review Board               |
| LAD               | Left Anterior Descending coronary artery |
| LCX               | Left Circumflex coronary artery          |
| LMS               | Left Main Stem coronary artery           |
| MACE              | Major adverse cardiovascular events      |
| MI                | Myocardial Infarction                    |
| MT                | Medical treatment                        |
| PCI               | Percutaneous coronary intervention       |
| RCA               | Right coronary artery                    |
| SE                | Stress echo                              |
| SPECT             | Single-Photon Emission Tomography        |

## 3 Summary

### 3.1 Professional Summary

|                                |                                                                                                                                                                                                                                                                                                                                                                                                                                                            |
|--------------------------------|------------------------------------------------------------------------------------------------------------------------------------------------------------------------------------------------------------------------------------------------------------------------------------------------------------------------------------------------------------------------------------------------------------------------------------------------------------|
| Protocol Title                 | FFRCT In Stable Heart disease & CCTA Helps Improve Patient care and Spending                                                                                                                                                                                                                                                                                                                                                                               |
| Investigation strategy         | CCTA plus FFRCT reduces healthcare resource utilization and costs compared to a CCTA strategy alone.                                                                                                                                                                                                                                                                                                                                                       |
| Study Principal Investigator   | Dr Timothy Fairbairn                                                                                                                                                                                                                                                                                                                                                                                                                                       |
| Academic Research Organization | Liverpool Centre for Cardiovascular Science (LCCS), Liverpool Heart and Chest Hospital, Liverpool, UK                                                                                                                                                                                                                                                                                                                                                      |
| Sponsor                        | The University of Liverpool                                                                                                                                                                                                                                                                                                                                                                                                                                |
| Participants and Study sites   | Approximately 100,000 patients from 25 sites who received a CCTA for the assessment of CAD in NHS England.                                                                                                                                                                                                                                                                                                                                                 |
| Study Planned Duration         | 36 months                                                                                                                                                                                                                                                                                                                                                                                                                                                  |
| Primary study objective        | To determine whether a CCTA and FFRCT diagnostic pathway reduces health-related events, time to diagnosis and overall healthcare costs compared to a 'standard of care' CCTA diagnostic chest pain pathway.                                                                                                                                                                                                                                                |
| Primary hypothesis             | The addition of FFRCT into a CCTA diagnostic pathway will be safe with no difference in major adverse cardiovascular event rates or death whilst reducing the time to diagnosis, result in fewer downstream tests and reduce overall costs to the healthcare system.                                                                                                                                                                                       |
| Population                     | Chest pain patients with suspected stable coronary artery disease being clinically investigated with a CCTA in England.                                                                                                                                                                                                                                                                                                                                    |
| Study Design and Methods       | A pragmatic 'real world' multi-centre, retrospective, observational analytic cohort study design. All patients receiving a CCTA at institutions utilising FFRCT as part of NHS England's Innovation and Technology Payment (ITP) programme. Participants will be recruited from 1 year pre-ITP and the 2 years of the ITP programme. Patients will be followed up at a minimum of 24-months post CCTA for the pre-defined primary and secondary endpoints. |
| Primary Endpoint               | Primary and secondary outcomes measured: <ol style="list-style-type: none"> <li>1. MI event rate, hospitalization for acute coronary syndrome, MI deaths and all-cause death.</li> <li>2. Downstream testing: numbers of non-invasive functional tests, and invasive coronary angiograms</li> </ol>                                                                                                                                                        |

|                    |                                                                                                                                                                                                   |
|--------------------|---------------------------------------------------------------------------------------------------------------------------------------------------------------------------------------------------|
|                    | <p>without revascularisation performed following the index FFRCT.</p> <p>3. Cost analysis: Total cost to the NHS of the index test and all downstream investigations and hospital admissions.</p> |
| Secondary Endpoint | <p>1. Time to diagnosis- Trust Referral to Treatment (RTT) time.</p> <p>2. Qualitative assessment of the impact of the FFRCT health technology</p>                                                |
| Study follow up    | Participants will be followed up to a minimum of 24 months                                                                                                                                        |

### 3.2 Plain English Summary

Chest pain may be a symptom that is related to a narrowing of the heart blood vessels (coronary artery disease [CAD]). This chest pain, known as angina, can result in a reduced quality of life and, if not diagnosed and managed appropriately, could result in a heart attack. Coronary disease remains the largest cause of death in the United Kingdom today, with one death every 4 minutes. Guidelines recommend the use of tests to help diagnose and manage chest pain 'angina' patients. Coronary computed tomography angiography (CCTA) is a test that takes images of the heart blood vessels. It is the main test for patients presenting with angina, as it is excellent at saying when the heart blood vessels are normal and can be reassuring for patients. However, when narrowing's are present CCTA lacks the ability to tell whether they are causing the patient's symptoms.

A new technology, CT-derived fractional flow reserve (FFRCT) uses the CCTA images to make a 3D model of the heart blood vessels that shows whether there is a limitation in the blood flow to the heart which is causing the symptoms. The National Institute for Health and Care Excellence (NICE) recommends the use of FFRCT in a chest pain pathway. However, use of this new technology remains limited due to funding restrictions and uncertainty as to its benefit in the NHS.

This study aims to determine the extent to which the new FFRCT technology is safe and reliable, provides a quicker time to diagnosis for the patient, reduces the need for further tests and thus does the investment in the test represent good value to the NHS.

## 4 Introduction

### 4.1 Background

The investigation of suspected stable coronary artery disease (CAD) should primarily be based on a non-invasive strategy (Knuuti *et al.*, 2020). In the United Kingdom Coronary Computed Tomography Angiography (CCTA) is now recommended as the first-line diagnostic test for patients with suspected angina and no prior CAD. (NICE, 2010) This recommendation by the National Institute for Health and Care Excellence (NICE) in 2016 was primarily driven by the very high sensitivity of CCTA to detect the presence or absence of coronary atheroma. (Nielsen *et al.*, 2014; Meijboom *et al.*, 2008) Given that the majority of patients with suspected angina turn out to have non-cardiac chest pain, and the majority of CCTA scans performed for this purpose show only minimal or no CAD, a significant proportion of patients can be immediately reassured by CCTA in the current NICE guidelines pathway. (Fordyce, Newby, & Douglas, 2016) However, in approximately a third of cases, CAD detected by CCTA is either indeterminate due to dense calcification or of intermediate severity which results in only modest specificity of CCTA to detect functionally significant 'ischaemic' CAD - and this remains its Achilles' heel. (Meijboom *et al.*, 2008)

Recent advances in technology allow the use of raw CCTA images with computational fluid dynamic modelling to produce a 3D haemodynamic representation of the coronary tree flow limitation. (Lee *et al.*, 2018) (Conte *et al.*, 2017) (Taylor, Fonte, Min, City, & Angeles, 2013) This CT-Derived Fractional Flow Reserve (FFRCT) has developed rapidly since first concept and is now used in routine clinical practice. NICE, in a medical technology guidance (MTG 32), stated 'the clinical and cost effectiveness evidence justified FFRCT's use as a second line functional test for indeterminate or intermediate coronary stenoses'. The guidance also commented that 'based on the current evidence, using HeartFlow FFRCT may lead to cost savings of £214 per patient. By adopting this technology the NHS in England may save a minimum of £9.1 million by 2022 through avoiding invasive investigation and treatment'.

### 4.2 Study Rationale

The accurate diagnosis of CAD is important to allow the appropriate medical treatment and post-test risk stratification to identify patients that might benefit from revascularisation.  $FFR_{CT}$  is a non-invasive physiological test that can assess flow limitation across a coronary stenosis with high diagnostic accuracy and good correlation to invasive FFR. (Nørgaard *et al.*, 2017)  $FFR_{CT}$  has been shown in trials to reduce the total number of inappropriate invasive coronary angiograms (ICAs) post-CCTA, by reducing the number of cases with no obstructive coronary artery disease. This increases the revascularization treatment rate, which represents a more efficient use of the expensive catheter angiography laboratory. (Douglas *et al.*, 2015) (Jensen *et al.*, 2017) (Nørgaard *et al.*, 2014) Patients could therefore be receiving the test with the highest accuracy, improving diagnostic certainty, thereby reducing unnecessary downstream tests and the time to treatment. The NHS should benefit by reducing the number of invasive tests and the wider economy will benefit from fewer lost working days. In addition, the ITP has allowed national coverage of  $FFR_{CT}$  which has the potential to remove regional variations in clinical practice and spending costs.

The existing evidence for the use of FFRCT is based on randomised controlled trials, registry studies and economic analysis from a US providers' perspective. There is no real-world comparative data, and no literature from the perspective of NHS practice, which differs from the more 'invasive' approach in the US. This research will answer whether an NHS FFRCT pathway is better for the patients in terms of safety, reducing unnecessary alternative tests and time to treatment compared to previous 'standard of care' diagnostic pathways (including CCTA alone, stress echocardiography, stress perfusion MRI and nuclear scintigraphy). The impact on the NHS will be determined by comparing costs of a CCTA and selective FFRCT pathway to those of a standard of care pathway as well as the number of hospital visits.

## 5 Study Objectives

### 5.1 Primary objective

The study aims to identify differences in health-related events, time to diagnosis and overall costs in a clinical population undergoing CCTA and FFR<sub>CT</sub> for symptoms suggestive of stable CAD, compared to a previous 'standard of care' diagnostic chest pain pathway.

### 5.2 Secondary objective

### 5.3 Primary Endpoints:

1. Safety: Has the implementation of FFR<sub>CT</sub> been safe?

End points: Myocardial infarction event rate, hospitalization for acute coronary syndromes and mortality (all-cause and cardiovascular).

2. Time to Diagnosis: Does FFR<sub>CT</sub> reduce the time to diagnosis and treatment?

End points: Trust Referral to Treatment (RTT) time.

3. Downstream testing: Does FFR<sub>CT</sub> reduce the number of downstream investigations and the number of overall invasive and non-invasive diagnostic tests?

End points: numbers of non-invasive functional tests, and invasive coronary angiograms without revascularisation performed following the index FFR<sub>CT</sub>.

4. Cost analysis: Does the technology represent value for money?

End point: Total cost to the NHS of the index test, all downstream investigations, hospital admissions and outpatient visits.

### 5.4 Exploratory Endpoints:



#### 5.4.1 Qualitative Assessment

A qualitative survey of clinicians at the NHS trusts implementing a FFRCT pathway will be performed to assess the impact of a change in the service aligned with FFRCT. Factors assessed will include: ease of implementation (governance and IT), user friendliness, ease of clinical integration and practicality.

#### 5.4.2 Imaging biomarkers

Using the list of CCTA originally provided by the sites, the participating centres PACS teams will send the anonymised CCTA datasets to the CTU data storage for future linkage to the outcome data provided by NHS Digital. This process will ensure that anonymity is preserved while providing for a valuable resource in terms of a large database of anonymised imaging datasets with outcome data. There will also be the opportunity to repeat the data capture from NHS Digital in future years to establish medium and long-term outcomes. The purpose of creating this repository of anonymised outcome and imaging data is to allow for future research projects into image analysis of CTA including deep learning algorithms, radiomics analysis, and biomechanical modelling of coronary arteries all with the goal to improving future risk stratification to better target therapeutic interventions.

## 6 Study Design

This is a multi-centre, retrospective, observational analytic cohort study design.

This pragmatic ‘real-world’ trial, is designed to utilise big data to answer practical health questions and determine clinical outcomes in a timely fashion. Randomized clinical trials (RCT’s) in comparative effectiveness research (CER) have been considered the gold standard. These are however, subject to several problems, including cost, patient selection bias and slow translation of knowledge into practice. (Angus, 2015) This study design removes any patient treatment heterogeneity effect seen in RCT’s by assessing the impact of a new intervention on a whole population. (Longford, 1999) by utilising the electronic health record (EHR) data already collected by the NHS. This trial will thus represent a true assessment of the effectiveness of a new health technology on a population basis in the current NHS system and will enable the rapid translation of research into clinical and health care policy decisions.

Participants will include all individuals who had a CCTA performed at an institute participating in the NHSE FFRCT ITP during 2018-2020. All CCTA 12 months prior to and up to 24 months following the start of a FFRCT programme (total study period 36 months) will be assessed. The cohort from this population that received an FFRCT will be separately identified, with linkage to the NHS digital data outcomes. HeartFlow will provide FFRCT-specific data.

NHS Digital’s Data Access Request Service (DARS) will be queried to provide the patient episodes over the study period. NHSD collects national data sets containing details of all admissions, accident and emergency (A&E) attendances, and outpatient appointments at NHS hospitals in England. DARS will extract data from the following data sets:

- Emergency Care Data Set (ECDS)
- Hospital Episode Statistics Admitted Patient Care (HES APC)

- Hospital Episode Statistics Critical Care (HES CC)
- Hospital Episode Statistics Outpatients (HES OPC)
- Hospital Episode Statistics Accident and Emergency (HES AE)
- Diagnostic Imaging Dataset (DID)
- Medicines Dispensed in Primary Care Data Set (from NHS Business Authority)
- Civil Registration Deaths

These data sets will provide the following information:

- Patient demographics (such as age group, gender and ethnicity)
- Administrative information (such as dates and methods of admission and discharge)
- Geographical information; such as where patients are treated and the area where they live (post code).
- Medications (type, dose and whether processed)
- ICA and revascularisation data linked to patients.
- Incidence of downstream testing; stress echocardiograms, stress MRI or nuclear scintigraphy.

Costs will be calculated for all hospital attendances, diagnostic investigations and treatments from the published NHS England National Prices and Tariff workbook (2017-2019- HRG/OPEC codes) with the appropriate market forces factor applied. Health economic modelling will be performed by the University of Liverpool.

Referral to treatment (RTT) data is collected by each NHS trust for each patient. This data will be collected by the local research teams.

## 7 Study Population

### 7.1 Setting and Target Population

The study population will include all patients that received a CCTA for symptoms suggestive of CAD at a participating institute, 12 months prior to the institutes first FFRCT study and up to 24 months following (total study period up to 36 months). The timeframe of study recruitment is dependent upon the starting time of each centre in the ITP programme. Centres that had a later start date (on-boarding) will have a shorter recruitment period, with a minimum of 12 months. These centres represent the 'real-world' NHS hospitals that are a mixture of secondary and tertiary referral centres (not dedicated academic or research sites) with clinical experience in CCTA who have met the minimum quality standards set out by NHS England. Thus, the study population represents a true reflection of the current CCTA practice in the national population, reducing the potential effect of selection bias seen in many RCT's.

A study population of 85,292 patients received either CCTA analysis alone (standard of care group, n=75,361) or CCTA and Heartflow FFRCT analysis (FFRCT group, n=9,799) during the two years of the new technology being available to each site. The total study population over the 36 months is likely to be over 100,000.

## 7.2 Inclusion Criteria

### 7.2.1 Site eligibility:

- Sites within NHS England with a FFRCT ITP programme commencing between April 1st 2018-March 31st 2020
- Sites must have performed a minimum number of  $\geq 50$  FFRCT within 1 year of their programme commencing

### 7.2.2 Individual eligibility:

- Age  $\geq 18$  years
- CCTA for the assessment of coronary artery disease (CAD)

## 7.3 Exclusion Criteria

- Age  $< 18$  years
- Coronary artery calcium scoring alone
- CCTA in addition to a second CT investigation for a non-coronary indication (CT TAVI, CT aorta)
- Previous CCTA within 6 months
- Prior CABG / MI
- Entry into a separate FFRCT research study during the study timeframe

## 7.4 Follow up

Patient data will be collected up to a minimum of 24 months post-CCTA. Clinical data will also be analysed for the 6 months pre-CCTA to ensure no cross over between diagnostic pathways and prior testing (including CCTA) within 6 months (Figure 1).

Longitudinal long-term follow-up ( $> 2$  years) at 5 and 10 years would be feasible and cost effective using the same methodology of HES downloads and data analysis. This would provide a true long-term perspective of health care resource use in a stable angina population

Figure 1 Study Design Overview

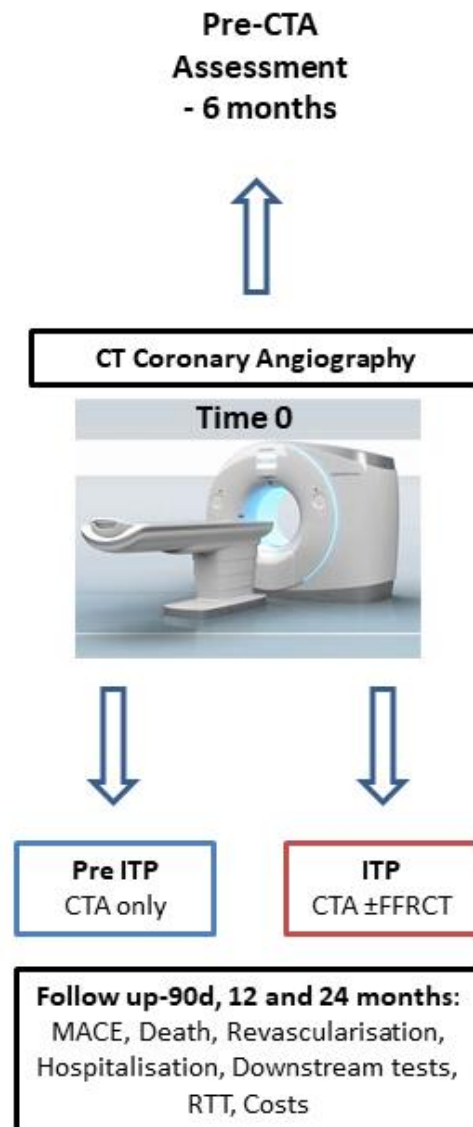

## 8 Statistical Methodology

### 8.1 Sample size and Power calculation

As an observational analytic cohort study design, this trial requires no power calculation for estimates of effect. However, multiple previous studies have guided the sample size and estimates of expected clinical outcomes. Disease prevalence at CCTA can be estimated from SCOTHEART (n=4778), where the coronary arteries were normal in 37%, non-obstructive CAD in 38% and

obstructive CAD in 25% of a UK population. The CONFIRM registry study showed in a contemporary US population of over 5000 patients investigated by CCTA that the annual event rate varied between 0.31% for normal coronary arteries to 2.06% in the instance of obstructive CAD (Leipsic et al., 2013). The international ADVANCE registry study of a patient population being investigated with FFRCT had cardiovascular event rates of 1.16% at 1 year. Thus, it is possible to estimate expected clinical outcome event rates and compare to actual observed events across the pathways to determine the safety of a UK CCTA pathway.

## 8.2 Statistical Analysis

Analysis of the primary end-point is based on the rate of adverse events (MACE) as a composite of all-cause death, myocardial infarction and invasive coronary angiography without revascularization. Event rates over time will be calculated using Kaplan-Meier methodology from the time of the CCTA. Cox proportional hazard ratios will be used to determine the odds ratio (OR) of receiving revascularization post FFRCT compared to other tests.

Time to diagnosis will be compared using an 'intention to diagnose analysis' by analysing groups according to their investigative test (FFRCT vs CCTA alone).

The primary cost analysis will include total patient pathway costs at 12 months, with comparison between the two testing strategies. The mean cost difference with 95% confidence intervals and P value will be calculated. Sub-analysis will categorise the total costs breakdown as; Investigations, hospital stay, procedural costs.

Cost sensitivity analyses will be applied to the modelling, looking at different cost utilities in the UK and regional variability.

## 9 Good Clinical Practice

### 9.1 Ethical Conduct

The study will be conducted in accordance with the principles of Good Clinical Practice (GCP). Ethical approval will be sought from the Health Regulatory Authority (HRA), the trial will comply with the principles set out in the declaration of Helsinki and the UK policy framework for health and social care research.

#### 9.1.1 Informed Consent

As a retrospective study we will be accessing confidential patient information without consent in England. Therefore, consent was approved on the basis of health and social care research in the public interest (National Health Service Act 2006 -s251 - 'Control of patient information'. , through an application to the Confidentiality Advisory Group (CAG) and ethical approval from the Health Regulatory Authority (HRA)

Patient information will be kept to a minimum needed for the purposes of the research project and will be kept securely for the duration of the study and up to 15 years post study completion. Data will be linked to health records using the NHS number by NHS Digital. All research sites and the clinical trials unit will comply with the UK General Data Protection Regulation (GDPR).

#### 9.1.2 Good Clinical Practice (GCP)

Members participating in the study will be encouraged to complete their GCP training.

## 9.2 Data Management and Confidentiality

### 9.2.1 Data Collection

The data will be collected from 25 NHS trusts participating in the NHS England ITP FFRCT programme, a life science industry (HeartFlow) and the national data collection institute (NHS Digital).

The sponsor and principal investigators are responsible for the handling, processing, accuracy and quality assurance of data collection. The study teams will be familiar with the study protocol and requirements. Data will be recorded in a confidential manner. The study staff will comply with the Data Protection Act 2018 with regards to collection, storage, processing and disclosure of data. All data will be stored within the NHS trust framework with password protection and external server backup. The legal basis for processing data will be based on the General Data Protection Regulation Article 6 (1) (e) and General Data Protection Regulation Article 9 (2) (j).

Publication of the study results will not include any patient identifiable data. Data will be archived and stored for 15 years.

### 9.2.2 FFRCT Data

Patient data was anonymised prior to sending to HeartFlow as part of the clinical service in accordance with local and national clinical governance regulations. Data linkage to the hospital episodes statistics will be performed using a non-identifiable, anonymised methodology. Patient data will remain anonymised and personal information will remain in the hands of NHS organisations.

### 9.2.3 Trial Management

The study will be conducted by a team of researchers including the principal investigator, co-investigators and a dedicated trial team at Liverpool Heart and Chest Hospital Clinical Trials Unit (CTU). A Trial Steering Committee will be formed and study oversight will be co-ordinated by the sponsors' research committee, with quarterly progress reports. All records will be made available to the sponsor and ethics committee for review or as part of an audit of the study.

## 10 References

Angus, D. C. (2015). Fusing randomized trials with big data: The key to self-learning health care systems? *JAMA - Journal of the American Medical Association*, 314(8), 767–768.

BHF. (2018). UK Factsheet. British Heart Foundation, <https://www.bhf.org.uk>(August).

Collet, C., Onuma, Y., Andreini, D., Sonck, J., Pompilio, G., Mushtaq, S., ... Serruys, P. W. (2018). Coronary computed tomography angiography for heart team decision-making in multivessel coronary artery disease. *European Heart Journal*, 39(41), 3689–3698.

Conte, E., Annoni, A., Pontone, G., Mushtaq, S., Guglielmo, M., Baggiano, A., ... Andreini, D. (2017). Evaluation of coronary plaque characteristics with coronary computed tomography angiography in patients with non-obstructive coronary artery disease : a long-term follow-up study. *European Heart Journal Cardiovascular Imaging*, 18, 1170–1178.

Curzen, N. P., Nolan, J., Zaman, A. G., Norgaard, B. L., & Rajani, R. (2016). Does the Routine Availability of CT – Derived FFR Influence Management of Patients With Stable Chest Pain Compared to CT Angiography Alone? *JACC. Cardiovascular Imaging*, 9(10), 1188–1194.

Danad, I., Van Rossum, A. C., Knaapen, P., Van De Ven, P. M., Van Royen, N., Raijmakers, P. G., ... Taylor, C. A. (2018). Head-to-head comparison of FFR-CT against coronary CT angiography and myocardial perfusion imaging for the diagnosis of ischaemia. *European Heart Journal*, 39(suppl\_1).

Douglas, P. S., Pontone, G., Hlatky, M. A., Patel, M. R., Norgaard, B. L., Byrne, R. A., ... De Bruyne, B. (2015). Clinical outcomes of fractional flow reserve by computed tomographic angiography-guided diagnostic strategies vs. usual care in patients with suspected coronary artery disease: the prospective longitudinal trial of FFRct: outcome and resource impacts stud. *European Heart Journal*, 36(47), 3359–3367.

Fairbairn, T. A., Nieman, K., Akasaka, T., Nørgaard, B. L., Berman, D. S., Raff, G., ... Patel, M. R. (2018). Real-world clinical utility and impact on clinical decision-making of coronary computed tomography angiography-derived fractional flow reserve : lessons from the ADVANCE Registry. *European Heart Journal*, 0(August), 1–11.

Fordyce, C. B., Newby, D. E., & Douglas, P. S. (2016). Diagnostic Strategies for the Evaluation of Chest Pain. *Journal of the American College of Cardiology*, 67(7), 843–852.

Hlatky, M. A., De Bruyne, B., Pontone, G., Patel, M. R., Norgaard, B. L., Byrne, R. A., ... Douglas, P. S. (2015). Quality-of-Life and Economic Outcomes of Assessing Fractional Flow Reserve with Computed Tomography Angiography: PLATFORM. *Journal of the American College of Cardiology*, 66(21), 2315–2323.

Izzat, L., & Knight, E. (2011). Copyright Medinews ( Cardiology ) Limited Reproduction Prohibited Copyright Medinews ( Cardiology ) Limited Reproduction Prohibited Copyright Medinews ( Cardiology ) Limited Reproduction Prohibited Copyright Medinews ( Cardiology ) Limited Reproduction Pr. *British Journal of Cardiology*, 18(2), 2009–2012.

- Jensen, J. M., Bøtker, H. E., Mathiassen, O. N., Grove, E. L., Øvrehus, K. A., Pedersen, K. B., ... Nørgaard, B. L. (2017). Computed tomography derived fractional flow reserve testing in stable patients with typical angina pectoris : influence on downstream rate of invasive coronary angiography. *European Heart Journal Cardiovascular Imaging*, 0, 1–10.
- Knuuti, J. *et al.* (2020) '2019 ESC guidelines for the diagnosis and management of chronic coronary syndromes', *European Heart Journal*, 41(3), pp. 407–477.
- Lee, S.-E., Sung, J. M., Rizvi, A., Lin, F. Y., Kumar, A., Hadamitzky, M., & Kim, Y.-J. (2018). Quantification of Coronary Atherosclerosis. *Circulation. Cardiovascular Imaging*, 14(July), 1–10.
- Leipsic, J., Taylor, C. M., Heilbron, B. G., Mancini, G. B. J., Achenbach, S., Berman, D. S., ... Min, J. K. (2013). Cardiovascular Risk among Stable Individuals Suspected of Having Coronary Artery Disease with No Modifiable Risk Factors : Results from an International Multicenter Study of 5262 Patients 1. *Radiology*, 267(3), 718–726.
- Longford, N. T. (1999). Selection bias and treatment heterogeneity in clinical trials. *Statistics in Medicine*, 18(12), 1467–1474.
- Lu, M. T., Ferencik, M., Roberts, R. S., Lee, K. L., Ivanov, A., Adami, E., ... Hoffmann, U. (2017). Noninvasive FFR Derived From Coronary CT Angiography: Management and Outcomes in the PROMISE Trial. *JACC: Cardiovascular Imaging*, 10(11), 1350–1358.
- Meijboom, W. B., Van Mieghem, C. A. G., van Pelt, N., Weustink, A., Pugliese, F., Mollet, N. R., ... de Feyter, P. J. (2008). Comprehensive Assessment of Coronary Artery Stenoses. Computed Tomography Coronary Angiography Versus Conventional Coronary Angiography and Correlation With Fractional Flow Reserve in Patients With Stable Angina. *Journal of the American College of Cardiology*, 52(8), 636–643.
- Min, J. K., Leipsic, J., Pencina, M. J., Berman, D. S., Koo, B. K., Van Mieghem, C., ... Mauri, L. (2012). Diagnostic accuracy of fractional flow reserve from anatomic CT angiography. *JAMA - Journal of the American Medical Association*, 308(12), 1237–1245.
- Nakazato, R., Park, H. B., Berman, D. S., Gransar, H., Koo, B. K., Erglis, A., ... Min, J. K. (2013). Noninvasive fractional flow reserve derived from computed tomography angiography for coronary lesions of intermediate stenosis severity results from the DeFACTO study. *Circulation: Cardiovascular Imaging*, 6(6), 881–889.
- NICE. (2010). Chest pain of recent onset: assessment and diagnosis. NICE Guidance, (March 2010). Retrieved from <https://www.nice.org.uk/guidance/cg95/chapter/guidance>
- Nielsen, L. H., Ortner, N., Nørgaard, B. L., Achenbach, S., Leipsic, J., & Abdulla, J. (2014). The diagnostic accuracy and outcomes after coronary computed tomography angiography vs. conventional functional testing in patients with stable angina pectoris: a systematic review and meta-analysis. *European Heart Journal Cardiovascular Imaging*, 15(9), 961–971.
- Nørgaard, B. L., Hjort, J., Gaur, S., Hansson, N., Bøtker, H. E., Leipsic, J., ... Jensen, J. M. (2017). Clinical Use of Coronary CTA–Derived FFR for Decision-Making in Stable CAD. *JACC: Cardiovascular Imaging*, 10(5), 541–550.
- Nørgaard, B. L., Leipsic, J., Gaur, S., Seneviratne, S., Ko, B. S., Ito, H., ... Achenbach, S. (2014). Diagnostic performance of noninvasive fractional flow reserve derived from coronary computed tomography angiography in suspected coronary artery disease: The NXT trial (Analysis of Coronary



Blood Flow Using CT Angiography: Next Steps). *Journal of the American College of Cardiology*, 63(12), 1145–1155.

Nørgaard, B. L., Terkelsen, C. J., Mathiassen, O. N., Grove, E. L., Bøtker, H. E., Parner, E., ... Jensen, J. M. (2018). Coronary CT Angiographic and Flow Reserve-Guided Management of Patients With Stable Ischemic Heart Disease. *Journal of the American College of Cardiology*, 72(18), 2123–2134.

Rajani, R., Webb, J., Marciniak, A., & Preston, R. (2015). Comparative efficacy testing - Fractional flow reserve by coronary computed tomography for the evaluation of patients with stable chest pain. *International Journal of Cardiology*, 183, 173–177.

Roel S. Driessen, MDa, Ibrahim Danad, MDa, Wijnand J. Stuijtzand, MDa, Pieter G. Raijmakers MD, PhDb, Stefan P. Schumacher, MDa, Pepijn A. van Diemen, MDa, Jonathon A. Leipsic, Md., Juhani Knuuti, MD, PhDd, S. Richard Underwood, MD, PhD, Peter M. van de Ven, P., & Albert C. van Rossum, MD, PhDa, Charles A. Taylor, PhDg, Paul Knaapen, MD, P. (2019). Comparison of Coronary Computed Tomography Angiography, Fractional Flow Reserve, and Perfusion Imaging for Ischemia Diagnosis. *Journal of the American College of Cardiology*, (2), 161–173.

Stewart, S., Murphy, N., Walker, A., McGuire, A., & McMurray, J. (2003). The current cost of angina pectoris to the National Health Service in the UK. *Heart*, 89(8), 848–853.

Taylor, C. A., Fonte, T. A., Min, J. K., City, R., & Angeles, L. (2013). Computational Fluid Dynamics Applied to Cardiac Computed Tomography for Noninvasive Quantification of Fractional Flow Reserve Scientific Basis. *Journal of the American College of Cardiology*, 61(22), 2233–2241.

Williams, M. C., Hunter, A., Shah, A. S. V., Assi, V., Lewis, S., Smith, J., ... Newby, D. E. (2016). Use of Coronary Computed Tomographic Angiography to Guide Management of Patients with Coronary Disease. *Journal of the American College of Cardiology*, 67(15), 1759–1768.

# FISH and CHIPS Analysis plan

## Background

Evaluation of the implementation of a health technology (Heartflow CT FFR) into the health system in NHS England. The FAC study encompasses all sites that were eligible and utilised the technology in its first year of roll out (2018). This represents a complex health intervention as it includes over 27 sites and 24 integrated care boards (ICB) across NHS England.

The aim of FAC is to determine the practical effectiveness of the complex health technology intervention on the system as a whole. Comparative analysis will differentiate between groups where the technology was not available (usual care) to times that the technology was available (new care) for clinical and cost effectiveness.

## Primary Analysis

Primary Endpoints:

1. MI event rate, MI deaths and all-cause death.
2. Invasive coronary angiogram without revascularization
3. Downstream testing: numbers of non-invasive functional tests, and invasive coronary angiograms without revascularisation performed following the index CTA
4. Cost analysis: Total cost to the NHS of the index test and all downstream investigations, hospital outpatient visits and hospital admissions.

Event rates of the composite outcome of MI, MI death or all cause death over-time will be calculated using Kaplan-Meier methodology from the time of the CCTA at 12 and 24 months. Stratification and multiple regression techniques will be used to address confounding variables with adjusted Odds Ratio (OR) used to determine clinical outcomes of 'usual care' versus 'new care'. The odds ratio (OR) of receiving angiography and revascularization post FFRCT compared to other tests will be determined. 95% confidence intervals (CI) will estimate the precision of the OR.

Interrupted Time Series (ITS) methods will be used to evaluate the impact of the health intervention. Interrelation pre and post intervention phases will be used and the effect metrics of a change in level versus a change in slope will be determined. The design of the ITS includes; Time interval (e.g. monthly); total number of observations; total number of time intervals; average number of observations per time interval;

Time to diagnosis will be compared using an 'intention to diagnose analysis' by analysing groups according to their investigative test (FFRCT vs CCTA alone).

**Comment:** For MACE events this will be analysed on first event basis rather than cumulative. For DIDs test will be on a cumulative basis.

Secondary Endpoints:

1. Time to diagnosis- Trust Referral to Treatment (RTT) time.
2. Qualitative assessment of the impact of the FFRCT health technology

The primary cost analysis will include total patient pathway costs at 24 months, with comparison between the two testing strategies. The mean cost difference with 95% confidence intervals and P value will be calculated. Sub-analysis will categorise the total costs breakdown as; Investigations, hospital stay, procedural costs.

Cost sensitivity analyses will be applied to the modelling, looking at different cost utilities in the UK and regional variability.

### **Interrupted Times Series Analysis**

**Study characteristics:** Author name, year of publication, rationale for using an ITS design, and type and description of the intervention or exposure.

**Design Time interval** (monthly), total number of observations before aggregation, total number of time intervals (n=60), and 2 segments (using the beginning time for each site entering the ITP programme), number of time intervals per segment, average number of observations per time interval and that there is a comparison group (FFRCT group).

**Outcome Description:** MI events, MI death, all cause death, ICA and revascularization rate and count of the outcomes at the individual observation level and description of the aggregate-level outcome (e.g., rate per population).

**Model:** Model shape (level change AND slope change); model type (ARIMA, segmented regression, other regression, and pre-post); modelling approach for any transition period; roll in implementation period of first 50 cases of CT FFR

**Statistical methods:** Statistical estimation method (e.g., logistic regression); with autocorrelation and outliers were investigated; and how they were handled in the analysis (Prais-Winsten correction); whether and how non-stationarity was tested for.

**Effect measures:** Reported effect measures (e.g., change in level and change in slope), whether an absolute or relative measure, effect estimates and statistics associated with the effect measure (e.g., P values and confidence intervals), details on any forecasting (e.g., projecting from one segment to a specified time point in another segment), and whether there was mention of any ceiling or floor effects.
